# Supplementary material for: Probing the assembly of highly vinyl-functionalized periodic mesoporous organosilica materials with crystal-like frameworks
Source: Royal Society of Chemistry journal article supplement (doi:10.1039/c003141k), 2010-01-01
Supplement: c003141k.pdf [file c003141k.pdf]

## Supplementary Information

Probing into assembling of highly vinyl-functionalized periodic mesoporous organosilica materials with crystal-like frameworks

Liao Yuan Xia<sup>1</sup>, Ming Qiu Zhang<sup>2</sup>, Min Zhi Rong<sup>2\*</sup> and Wei Min Xu<sup>2</sup>

<sup>1</sup>*Key Laboratory for Polymeric Composite and Functional Materials of Ministry of Education, DSAPM Lab, School of Chemistry and Chemical Engineering, Zhongshan University, Guangzhou 510275, P. R. China*

<sup>2</sup>*Materials Science Institute, Zhongshan University, Guangzhou 510275, P. R. China*

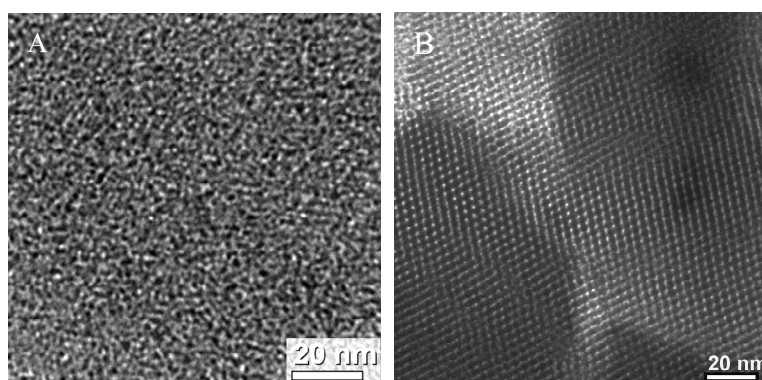

**Figure S1** TEM images of vinyl-functionalized PMOs based on BTEB/TEVS viewed in (100) direction. (A) TEVS-15, worm-like; (B) TEVS-30, *P6mm*.

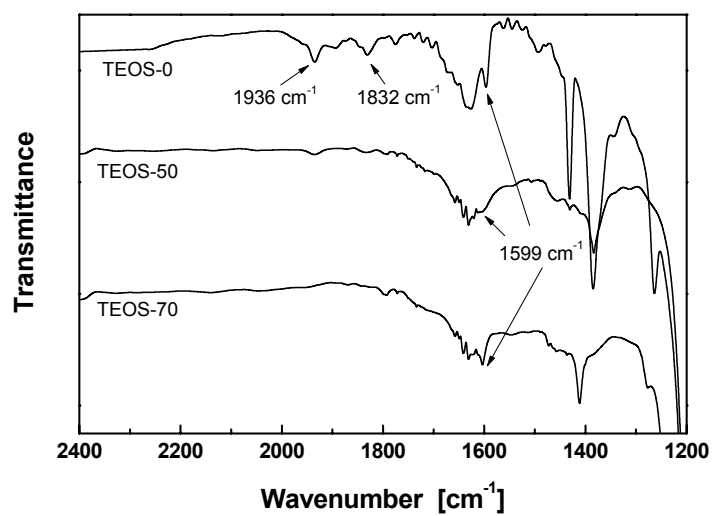

**Figure S2** FTIR spectra of vinyl-functionalized PMOs based on BTEB/TEOS/TEVS with various molar percentages of TEOS.

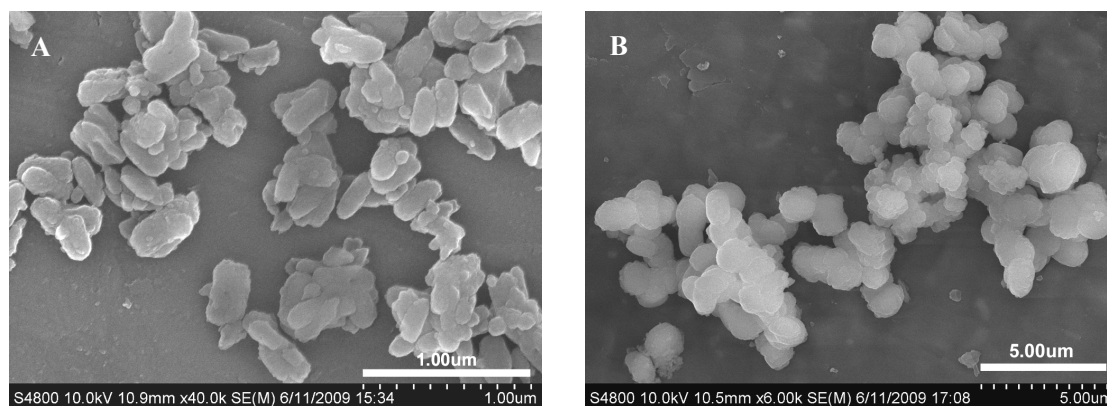

**Figure S3** SEM images of vinyl-functionalized PMOs based on BTEB/TEVS. (A) TEVS-25; (B) TEVS-40.

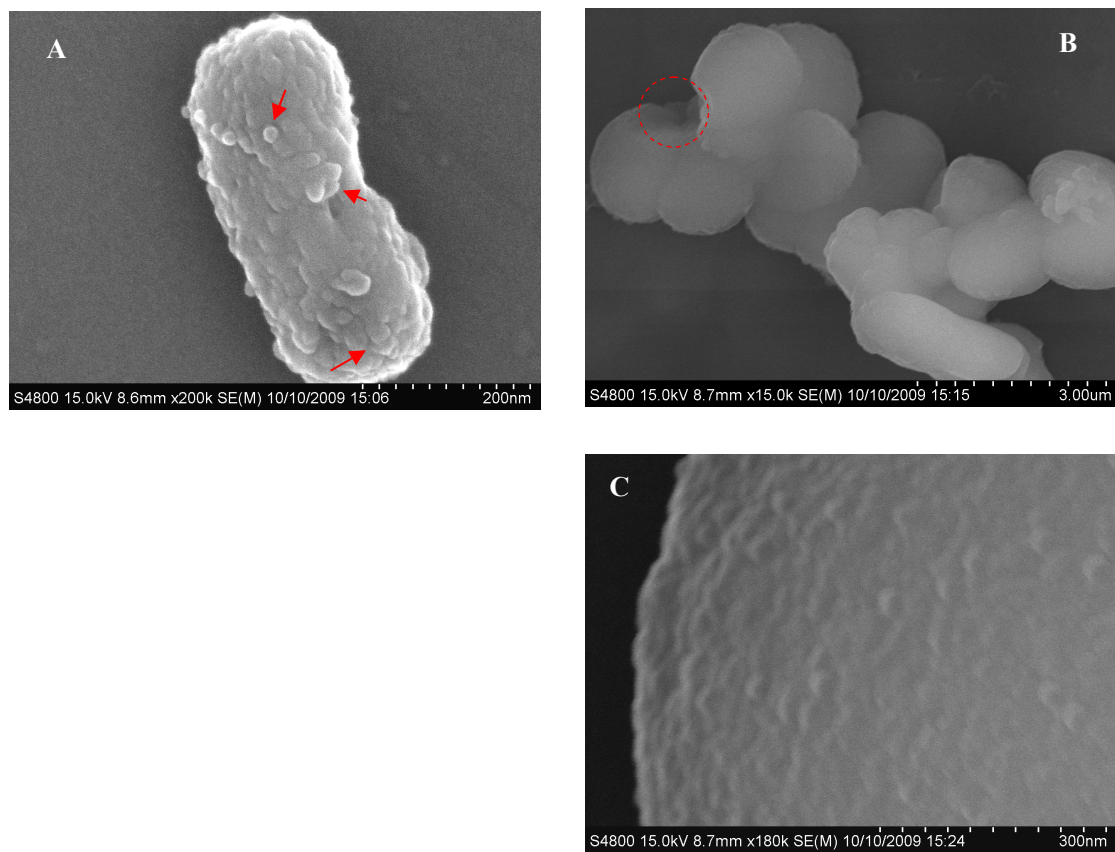

**Figure S4** SEM images of vinyl-functionalized PMOs based on BTEB/TEVS. (A) TEVS-15; (B) TEVS-60; (C) magnified (B).
